# Supplementary material
Source: PubMed Central journal article supplement (PMC4653069)
Supplement: NIHMS696797-supplement-supplement_1.pdf [file NIHMS696797-supplement-supplement_1.pdf]

**Supplementary Table 1: Comparison of baseline characteristics between persons with and without  $\geq 30\%$  decline in eGFR at follow-up**

|                                    | <30% decline    | $\geq 30\%$ decline |
|------------------------------------|-----------------|---------------------|
| N (423)                            | 231             | 192                 |
| <b>Demographics</b>                |                 |                     |
| Age, years                         | 76.5 $\pm$ 3.9  | 76.5 $\pm$ 3.4      |
| Male                               | 37.2            | 40.6                |
| Blacks                             | 13.4            | 15.6                |
| <b>Site</b>                        |                 |                     |
| Wake Forest                        | 16.9            | 20.5                |
| UC Davis                           | 34.2            | 32.3                |
| Johns Hopkins                      | 21.2            | 17.2                |
| Univ. of Pittsburgh                | 27.7            | 25.5                |
| <b>Lifestyle Factors</b>           |                 |                     |
| Smoking status                     |                 |                     |
| Never                              | 48.9            | 49.5                |
| Former                             | 45.0            | 42.2                |
| Current                            | 6.1             | 8.3                 |
| Pack years (current & former)      | 27.2 $\pm$ 22.7 | 30.5 $\pm$ 31.9     |
| Alcohol consumption                |                 |                     |
| None                               | 46.1            | 51.0                |
| <7 drinks/week                     | 41.3            | 31.3                |
| $\geq 7$ drinks/week               | 12.6            | 17.7                |
| <b>Cardiovascular Risk Factors</b> |                 |                     |
| Diabetes                           | 9.1             | 18.4                |
| History of MI                      | 7.4             | 10.9                |
| History of Stroke                  | 3.0             | 3.6                 |
| History of HF                      | 5.2             | 6.8                 |

|                                   |                    |                    |
|-----------------------------------|--------------------|--------------------|
| CKD (eGFR<60ml/min)               | 30.7               | 32.8               |
| Systolic BP (mm Hg)               | 133.7 ± 18.6       | 140.7 ± 19.7       |
| BMI (kg/m <sup>2</sup> )          | 27.2 ± 4.4         | 28.2 ± 4.6         |
| <b>Laboratory measures</b>        |                    |                    |
| Fasting glucose (mg/dL)           | 97.6 ± 24.8        | 105.8 ± 38.4       |
| Total Cholesterol (mg/dL)         | 204.8 ± 35.1       | 198.6 ± 39.5       |
| CRP (mg/L)*                       | 2.17 (0.93 ,4.23)  | 3.11 (1.53 ,6.57)  |
| eGFR (ml/min/1.73m <sup>2</sup> ) | 76.3 ± 18.1        | 73.6 ± 18.9        |
| Urine ACR (mg/g)*                 | 6.40 (4.00 ,12.30) | 9.30 (4.80 ,18.75) |
| <b>Medication use</b>             |                    |                    |
| Antihypertensive                  | 48.1               | 58.3               |
| Lipid lowering                    | 11.7               | 17.7               |

All values represented as % or mean ±SD except those marked with \* which are median (inter quartile range).  
Abbreviations: MI-myocardial infarction, HF-heart failure, CKD- chronic kidney disease, Systolic BP-systolic blood pressure, BMI- body mass index, CRP- C reactive protein, eGFR-estimated glomerular filtration rate, ACR- albumin-creatinine ratio

**Supplementary Table 2: Association of uUMOD with composite renal endpoint ( $\geq 30\%$  decline in eGFR or end-stage renal disease)**

| uUMOD $\mu\text{g/mL}$                      | # of events | Adjusted OR <sup>†</sup><br>(95% CI) |
|---------------------------------------------|-------------|--------------------------------------|
| Per SD increase<br>(19.7 $\mu\text{g/mL}$ ) | 237         | 0.74 (0.59, 0.93)                    |
| $\leq 17.25$                                | 74          | 1.00 (ref)                           |
| $> 17.25-25.88$                             | 59          | 1.03 (0.55, 1.90)                    |
| $> 25.88-38.86$                             | 56          | 1.10 (0.59, 2.05)                    |
| $> 38.86$                                   | 48          | 0.53 (0.29, 0.98)                    |

<sup>†</sup> Adjusted for age, gender, race, education, clinic site, eGFR, urine ACR, smoking status, pack-years, BMI, diabetes, SBP, BP med use, total cholesterol, lipid medication use, and CRP.

**Supplementary Table 3: Association of uUMOD with composite non-renal endpoint (incident cardiovascular disease and mortality)**

| uUMOD $\mu\text{g/mL}$                      | # of events | Adjusted OR <sup>†</sup><br>(95% CI) |
|---------------------------------------------|-------------|--------------------------------------|
| Per SD increase<br>(19.7 $\mu\text{g/mL}$ ) | 603         | 0.94 (0.86, 1.03)                    |
| $\leq 17.25$                                | 157         | 1.00 (ref)                           |
| $> 17.25-25.88$                             | 149         | 0.90 (0.71, 1.14)                    |
| $> 25.88-38.86$                             | 156         | 0.82 (0.65, 1.04)                    |
| $> 38.86$                                   | 141         | 0.75 (0.59, 0.95)                    |

<sup>†</sup> Adjusted for age, gender, race, education, clinic site, eGFR, urine ACR, smoking status, pack-years, BMI, diabetes, SBP, BP med use, total cholesterol, lipid medication use, and CRP.
